# Supplementary material for: Effects of short-term dry immersion on bone remodeling markers, insulin and adipokines
Source: PubMed Central journal article supplement (PMC5555617; doi:10.1371/journal.pone.0182970), 2017-08-14
Supplement: pone.0182970.s001.pdf [file pone.0182970.s001.pdf]

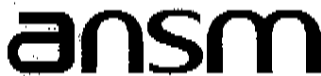

Agence nationale de sécurité du médicament  
et des produits de santé

## AUTORISATION D'ESSAI CLINIQUE NE PORTANT PAS SUR UN PRODUIT DE SANTE (ESSAI-HPS)

Nombre de pages : **1**

(Incluant la page de garde)

Envoi par Télécopie

Date : **3 NOV. 2014**

| Identifiants de l'essai clinique                                                                                                        |                                                                                                                                                                                      |                                       |                                                        |                |                       |
|-----------------------------------------------------------------------------------------------------------------------------------------|--------------------------------------------------------------------------------------------------------------------------------------------------------------------------------------|---------------------------------------|--------------------------------------------------------|----------------|-----------------------|
| Titre                                                                                                                                   | EVALUATION OF THE PHYSIOLOGICAL EFFECTS OF 3 DAYS OF DRY IMMERSION USED AS A GROUND-BASED MODEL TO STUDY THE EFFECTS OF WEIGHTLESSNESS: A PILOT STUDY ON 12 HEALTHY MALE VOLUNTEERS. |                                       |                                                        |                |                       |
| Promoteur                                                                                                                               | CNES                                                                                                                                                                                 | Ref. CPP                              | 1-14-26                                                |                |                       |
| Ref. Promoteur                                                                                                                          | 14-962 / DI study                                                                                                                                                                    | N° ID RCB                             | 2014-A00904-43                                         | Ref. ANSM      | 140997B-81            |
| <b>Expéditeur</b>                                                                                                                       |                                                                                                                                                                                      |                                       | <b>Destinataire</b> (demandeur : nom / société / tél.) |                |                       |
| ANSM / Direction des dispositifs médicaux thérapeutiques et des cosmétiques / Equipe produits dispositifs médicaux cardiovasculaires    |                                                                                                                                                                                      |                                       | Marie-Pierre BAREILLE<br>MEDES-IMPS<br>05 62 17 49 50  |                |                       |
| Dossier suivi par : Stéphanie VALLET<br>Tél : 33 (0) 1 55 87 36 57 / Fax : 33 (0) 1 55 87 37 17<br>Mel : stephanie.vallet@ansm.sante.fr |                                                                                                                                                                                      |                                       | Fax : <b>05 62 17 49 51</b>                            |                |                       |
| <b>CPP destinataire en copie</b>                                                                                                        |                                                                                                                                                                                      | Sud-Ouest et Outre-Mer I (Toulouse 1) |                                                        | <b>Fax</b>     | <b>05.34.30.27.38</b> |
|                                                                                                                                         |                                                                                                                                                                                      |                                       |                                                        | <b>Code 08</b> |                       |

Vu le code de la santé publique et notamment ses articles L. 1123-8, R. 1123-32 et vu le dossier de demande d'autorisation d'essai clinique adressé à l'Agence nationale de sécurité du médicament et des produits de santé (ANSM) ;

Vu les compléments versés par le promoteur en date du 31 octobre 2014 et notamment le protocole de l'essai cité en objet modifié (version 5 datée du 29 octobre 2014), suite à la demande de l'ANSM ;

**L'autorisation mentionnée à l'article L. 1123-8 du code de la santé publique est accordée pour l'essai clinique cité en objet.** Cette autorisation est valable pour toute la durée de l'essai à compter de la date de la présente décision.

Toutefois, conformément à l'article R. 1123-33 du code de la santé publique, la présente autorisation devient caduque si la recherche n'a pas débuté dans un délai d'un an.

En outre, je vous rappelle notamment que pendant le déroulement de la recherche et pour ce qui concerne l'ANSM :

- toute modification substantielle du dossier initialement soumis doit faire l'objet d'une demande d'autorisation en vertu des articles L. 1123-9 et R. 1123-35 du code de la santé publique ;
- les effets indésirables graves inattendus ainsi que les faits nouveaux susceptibles de porter atteinte à la sécurité des personnes doivent être déclarés en vertu des articles L. 1123-10 et R. 1123-46 du code de la santé publique.

Je vous demande de transmettre toute demande d'informations complémentaires concernant ce dossier par courriel adressé à la boîte : [ams-essaiscliniques@ansm.sante.fr](mailto:ams-essaiscliniques@ansm.sante.fr). Je vous précise qu'il vous est possible d'utiliser à cet effet le système de messagerie électronique sécurisée Eudralink. Lors de l'envoi de ces dossiers, je vous demande de veiller à reporter dans l'objet du message les mentions suivantes :

- pour les MS transmises à l'Ansm pour information : **MSI/ Réf ANSM du dossier**
- pour les MS soumises pour autorisation ou pour les dossiers mixtes (comportant des modifications soumises pour autorisation et d'autres pour information) : **MSA/ Réf ANSM du dossier**

La chef produits dispositifs médicaux cardio-vasculaires  
Direction des dispositifs médicaux thérapeutiques,  
et des cosmétiques

**Si vous ne recevez pas toutes les pages de cette lettre, veuillez contacter le secrétariat de la Direction Produit Direction des dispositifs médicaux thérapeutiques et des cosmétiques au : 33 (0) 1 55 87 36 87.**

#### Confidentialité

Cette transmission est à l'attention exclusive du(des) destinataire(s) ci-dessus mentionné(s) et peut contenir des informations privilégiées et/ou confidentielles. Si vous n'êtes pas le destinataire voulu ou une personne mandatée pour lui remettre cette transmission, vous avez reçu ce document par erreur et toute utilisation, révélation, copie ou communication de son contenu est interdite. Si vous avez reçu cette transmission par erreur, veuillez nous en informer par téléphone immédiatement et nous retourner le message original par courrier. Merci.

#### Confidentiality

This transmission is intended to the addressee(s) listed above only and may contain preferential or/and confidential information. If you are not the intended recipient, you are hereby notified that you have received the document by mistake and any use, disclosure, copying or communication of the content of this transmission is prohibited. If you have received this transmission by mistake, please call us immediately and return the original message by mail. Thank you.

**ansm**Agence nationale de sécurité du médicament  
et des produits de santé**Nombre de pages : 1**

(incluant la page de garde)

**Envoi par Télécopie****Date : 3 NOV. 2014****Identifiants de l'essai clinique**

|                |                                                                                                                                                                                      |           |                |           |            |
|----------------|--------------------------------------------------------------------------------------------------------------------------------------------------------------------------------------|-----------|----------------|-----------|------------|
| Titre          | EVALUATION OF THE PHYSIOLOGICAL EFFECTS OF 3 DAYS OF DRY IMMERSION USED AS A GROUND-BASED MODEL TO STUDY THE EFFECTS OF WEIGHTLESSNESS: A PILOT STUDY ON 12 HEALTHY MALE VOLUNTEERS. |           |                |           |            |
| Promoteur      | CNES                                                                                                                                                                                 | Réf. CPP  | 1-14-26        |           |            |
| Réf. Promoteur | 14-962 / DI study                                                                                                                                                                    | N° ID RCB | 2014-A00904-43 | Réf. ANSM | 140997B-81 |

**Expéditeur**ANSM / Direction des dispositifs médicaux thérapeutiques et  
des cosmétiques / Equipe produits dispositifs médicaux  
cardiovasculaires

Dossier suivi par : Stéphanie VALLET

Tél : 33 (0) 1 55 87 36 57/ Fax : 33 (0) 1 55 87 37 17

Mel : stephanie.vallet@ansm.sante.fr

**Destinataire (demandeur : nom / société / tél.)**Marie-Pierre BAREILLE  
MEDES-IMPS  
05 62 17 49 50Fax **05 62 17 49 51****CPP destinataire en copie** Sud-Ouest et Outre-Mer I (Toulouse 1) Fax **05.34.30.27.38** Code **08**

Madame,

L'autorisation d'essai concernant l'essai ci-dessus référencé vous a été adressée ce jour.

Toutefois, je vous rappelle la nécessité de prise de précautions concernant le stockage des bouteilles de monoxyde de carbone afin d'éviter tout accident en cas de fuite compte tenu de la toxicité de ce gaz et ainsi garantir la sécurité du personnel et des volontaires.

A ce propos, je vous invite à consulter la mise au point du 16 juillet 2012 relative aux risques et précautions d'emploi liés à l'utilisation des gaz à usage médical publiée sur le site de l'agence et accessible via le lien suivant : [http://ansm.sante.fr/var/ansm\\_site/storage/original/application/64200b285675bf190d364fdaf0a4e4b8.pdf](http://ansm.sante.fr/var/ansm_site/storage/original/application/64200b285675bf190d364fdaf0a4e4b8.pdf)

Je vous prie d'agréer, Madame, l'assurance de ma considération distinguée.

La chef produits dispositifs médicaux cardio-vasculaires  
Direction des dispositifs médicaux thérapeutiques,  
et des cosmétiques**Nathalie MARLIAC****Si vous ne recevez pas toutes les pages de cette télécopie, veuillez contacter le secrétariat  
de la Direction Produit Direction des dispositifs médicaux thérapeutiques et des cosmétiques  
au : 33 (0) 1 55 87 36 87.****Confidentialité**

Cette transmission est à l'attention exclusive du(des) destinataire(s) ci-dessus mentionné(s) et peut contenir des informations privilégiées et/ou confidentielles. Si vous n'êtes pas le destinataire voulu ou une personne mandatée pour lui remettre cette transmission, vous avez reçu ce document par erreur et toute utilisation, révélation, copie ou communication de son contenu est interdite. Si vous avez reçu cette transmission par erreur, veuillez nous en informer par téléphone immédiatement et nous retourner le message original par courrier. Merci.

**Confidentiality**

This transmission is intended to the addressee(s) listed above only and may contain preferential or/and confidential information. If you are not the intended recipient, you are hereby notified that you have received the document by mistake and any use, disclosure, copying or communication of the content of this transmission is prohibited. If you have received this transmission by mistake, please call us immediately and return the original message by mail. Thank you.

code : Q16CDOC004bis v01
