# Supplementary material for: Effects of short-term dry immersion on bone remodeling markers, insulin and adipokines
Source: PLoS One. 2017 Aug 14;12(8):e0182970. doi: 10.1371/journal.pone.0182970 (PMC5555617; doi:10.1371/journal.pone.0182970)
Supplement: S2 File — (PDF) [file pone.0182970.s002.pdf]

**COMITÉ de PROTECTION des PERSONNES  
SUD-OUEST ET OUTRE-MER I**

Secrétariat : Mme CHÉRON - Mme VERDEILLE  
AGENCE RÉGIONALE de SANTÉ MIDI PYRÉNÉES – Bureau 1028  
10 chemin du raisin - 31050 TOULOUSE CEDEX 9

Tél : 05 34 30 27 55 / 05 34 30 27 56 - Fax 05 34 30 27 38 - Mail : [cpps00m1-2@ars.sante.fr](mailto:cpps00m1-2@ars.sante.fr)

Président : Denis BENAYOUN  
Vice-Présidente : Catherine PIENKOWSKI  
Secrétaires : Laurence NEGRE-  
PAGES

Jean Michel SENARD

**Membres Titulaires et Suppléants**

**1<sup>er</sup> collège**

\* personnes qualifiées en recherche  
Catherine PIENKOWSKI  
Jean-Michel SENARD  
Philippe BOURIN  
Laurence NEGRE-PAGES  
Jeanne-Hélène de DONATO  
Eric SCHMIDT  
Emilie BERARD  
Yamina BONGARD

\* médecins généralistes  
Serge ANE  
Joël LE KERNEAU

\* pharmaciens hospitaliers  
Etienne CHATELUT

\* infirmiers  
Christian CAZOTTES  
Frédéric DESPAU

**2<sup>ème</sup> collège**

\* personnes qualifiées en éthique  
Didier MERCKX  
Jean CLAVERIE

\* psychologues  
Josiane PERISSE  
Béatrice HENDERSON

\* travailleur social  
Julie PACOT  
Anne DALLONGEVILLE

\* juristes  
Denis BENAYOUN  
Emmanuelle RIAL-SEBBAG  
Danièle CHARRAS  
Isabelle POIROT-MAZERES

\* représentants d'associations et usagers de la santé  
Christophe DIVERNET  
Sylvie SFEDI  
Marie-Ange DELORD-LEOPHONTE  
Jacques SERVILLE

**MEDES - IMPS**

Madame Marie-Pierre BAREILLE  
BP 74404

31045 Toulouse cedex 4

Toulouse, le 26 Août 2014

Madame,

Dans sa séance du 25 Août 2014, le comité de protection des personnes (C.P.P.) Sud-Ouest et Outre-Mer I a examiné les modifications apportées au projet de recherche intitulé :

**Evaluation of the physiological effects of 3 days of dry immersion used as a ground-based model to study the effects of weightlessness: a pilot study on 12 healthy male volunteers – protocole 14-962 version 2 du 29 Juillet 2014**

que vous lui avez soumis en qualité représentant du promoteur, le CNES, et dont l'investigateur-coordonnateur est le Dr Arnaud BECK, service de Recherche Clinique Spatiale au MEDES / IMPS

Etaient présents en qualité de titulaires : Mme PIENKOWSKI médecin, Mme BERARD médecin épidémiologiste, Mme NEGRE-PAGES épidémiologiste, Dr ANÉ médecin généraliste, Mr CHATELUT pharmacien hospitalier, Mr CAZOTTES infirmier (1<sup>er</sup> collège) ; Mr MERCKX personne compétente en matière d'éthique, Mme HENDERSON psychologue, Me BENAYOUN et Mme RIAL-SEBBAG personnes compétentes en matière juridique, Mr DIVERNET et Mr SERVILLE représentants des associations de malades et usagers de la santé (2<sup>ème</sup> collège).

Assistaient aussi à la séance, en qualité de suppléants : Mme DI DONATO scientifique, Dr SCHMIDT médecin (1<sup>er</sup> collège) ; Mr CLAVERIE personne compétente en matière d'éthique, Mme DALLONGEVILLE travailleur social, Mmes CHARRAS et POIROT-MAZERES personnes compétentes en matière juridique, (2<sup>ème</sup> collège).

Après examen de ces modifications (courrier de réponse daté et signé du 29/07/2014, la demande d'autorisation auprès de l'ANSM datée et signée du 29 juillet 2014, le document additionnel daté et signé du 26 juin 2014, la notice d'information et le formulaire de consentement - version 2 du 29/07/2014, le protocole - version 2 du 29/07/2014, le résumé - version 2 du 29/07/2014, la demande d'autorisation datée du 29/07/2014), le comité estime que : La justification de l'étude est pertinente ; le rapport des bénéfices et des risques est acceptable.

Les objectifs de votre recherche sont bien définis et bien argumentés.

Les moyens mis en œuvre pour atteindre ces objectifs sont décrits avec suffisamment de précision et semblent bien adaptés à la solution du problème abordé.

La méthodologie est clairement décrite et adaptée aux objectifs.

La notice d'information et le formulaire de consentement sont clairement rédigés et contiennent toutes les mentions nécessaires.

En conséquence, le CPP Sud-Ouest et Outre-Mer I émet un :

**AVIS FAVORABLE**

à la réalisation de votre projet.

Je vous prie d'agréer, Madame, l'assurance de ma considération distinguée.

Le Président  
Me D. BENAYOUN
